# Supplementary material for: Cerium-Doped Iron Oxide Nanorod Arrays for Photoelectrochemical Water Splitting
Source: MDPI journal article supplement (doi:10.3390/molecules27249050), 2022-12-19
Supplement: s1 [file s1]

## Supplementary Information

### Cerium-doped iron oxide nanorod arrays for photoelectrochemical water splitting

Hai-Peng Zhao <sup>a,b,c</sup>, Mei-Ling Zhu <sup>b,c,d</sup>, Hao-Yan Shi <sup>b,c,e</sup>, Qian-Qian Zhuo <sup>b,c</sup>, Rui  
Chen <sup>b,c</sup>, Shi-Wei Lin <sup>b,c</sup>, Mei-Hong Tong <sup>b,c</sup>, Ming-Hao Ji <sup>b,c</sup>, Xia Jiang <sup>b,c</sup>, Chen-  
Xing Liao <sup>a</sup>, Yan-Xin Chen <sup>b,c,e,f\*</sup>, Can-Zhong Lu <sup>b,c,d,e,f\*</sup>

<sup>a</sup> School of Rare Earth, Jiangxi University of Science and Technology, Ganzhou 341000,  
Jiangxi, China

<sup>b</sup> CAS Key Laboratory of Design and Assembly of Functional Nanostructures, and  
Fujian Provincial Key Laboratory of Nanomaterials, Fujian Institute of Research on  
the Structure of Matter, Chinese Academy of Sciences, Fuzhou 350002, China

<sup>c</sup> Xiamen Key Laboratory of Rare Earth Photoelectric Functional Materials, Xiamen  
Institute of Rare-earth Materials, Haixi Institutes, Chinese Academy of Sciences,  
Xiamen 361021, China

<sup>d</sup> School of Rare Earths, University of Science and Technology of China, Hefei 230026,  
China

<sup>e</sup> College of Chemical Science, University of Chinese Academy of Sciences, Beijing  
100049, China

<sup>f</sup> Fujian Science & Technology Innovation Laboratory for Optoelectronic Information  
of China, Fuzhou 350108, China

\***Email:** [yanxinchen@fjirsm.ac.cn](mailto:yanxinchen@fjirsm.ac.cn) and [czlu@fjirsm.ac.cn](mailto:czlu@fjirsm.ac.cn)

**Table S1.** H<sub>2</sub> Production of Ce-doped Materials

| Materials                               | H <sub>2</sub> Production<br>Of Materials    | Ce-doped Materials                                                  | H <sub>2</sub> Production<br>of Ce-doped<br>Materials | Bias                                | Electrolyte                                                             | ref          |
|-----------------------------------------|----------------------------------------------|---------------------------------------------------------------------|-------------------------------------------------------|-------------------------------------|-------------------------------------------------------------------------|--------------|
| Fe <sub>2</sub> O <sub>3</sub> nanorods | 3.96μmol<br>h <sup>-1</sup> cm <sup>-2</sup> | Ce-Fe <sub>2</sub> O <sub>3</sub> nanorods                          | 122μmol h <sup>-1</sup> cm <sup>-2</sup>              | 1.6V vs. RHE                        | 1MKOH                                                                   | This<br>work |
| ZnO nanowire                            | 125ppm                                       | CeO <sub>2</sub> /Ce-ZnO nanowire                                   | 225ppm                                                | 1.0 V vs. RHE                       | 0.1 MKOH with<br>0.1 M glycerol                                         | [1]          |
| BaTiO <sub>3</sub> nanoassemblies       | 13μmol h <sup>-1</sup> cm <sup>-2</sup>      | Ce-BaTiO <sub>3</sub> nanoassemblies                                | 23μmol h <sup>-1</sup> cm <sup>-2</sup>               | 0.7 V vs. Pt                        | 1 mM NaOH                                                               | [2]          |
| TiO <sub>2</sub> nanotube               | 125ml h <sup>-1</sup> cm <sup>-2</sup>       | Ce/Ce <sub>2</sub> O/CeO <sub>2</sub> /TiO <sub>2</sub><br>nanotube | 223μmol h <sup>-1</sup> cm <sup>-2</sup>              | 0.7 V vs. open<br>circuit potential | 0.1M Na <sub>2</sub> SO <sub>4</sub><br>with 10vol %<br>Ethylene glycol | [3]          |

**Table S2.** ICP and ICP-MS of Fe<sub>2</sub>O<sub>3</sub> (FT) and Ce-doped Fe<sub>2</sub>O<sub>3</sub> (1CFT, 5CFT, 10CFT).

| Sample | Fe(ppb) | Ti(ppb) | atomic<br>ratio(%) | Ce(ppb) | atomic<br>ratio(%) |
|--------|---------|---------|--------------------|---------|--------------------|
| FT     | 5695    | 22.186  | 0.390%             | 0.0007  | 0.000012%          |
| 1CFT   | 4443    | 26.925  | 0.606%             | 0.368   | 0.0083%            |
| 5CFT   | 4521    | 40.967  | 0.906%             | 0.162   | 0.0036%            |
| 10CFT  | 4124    | 22.054  | 0.535%             | 0.115   | 0.0028%            |

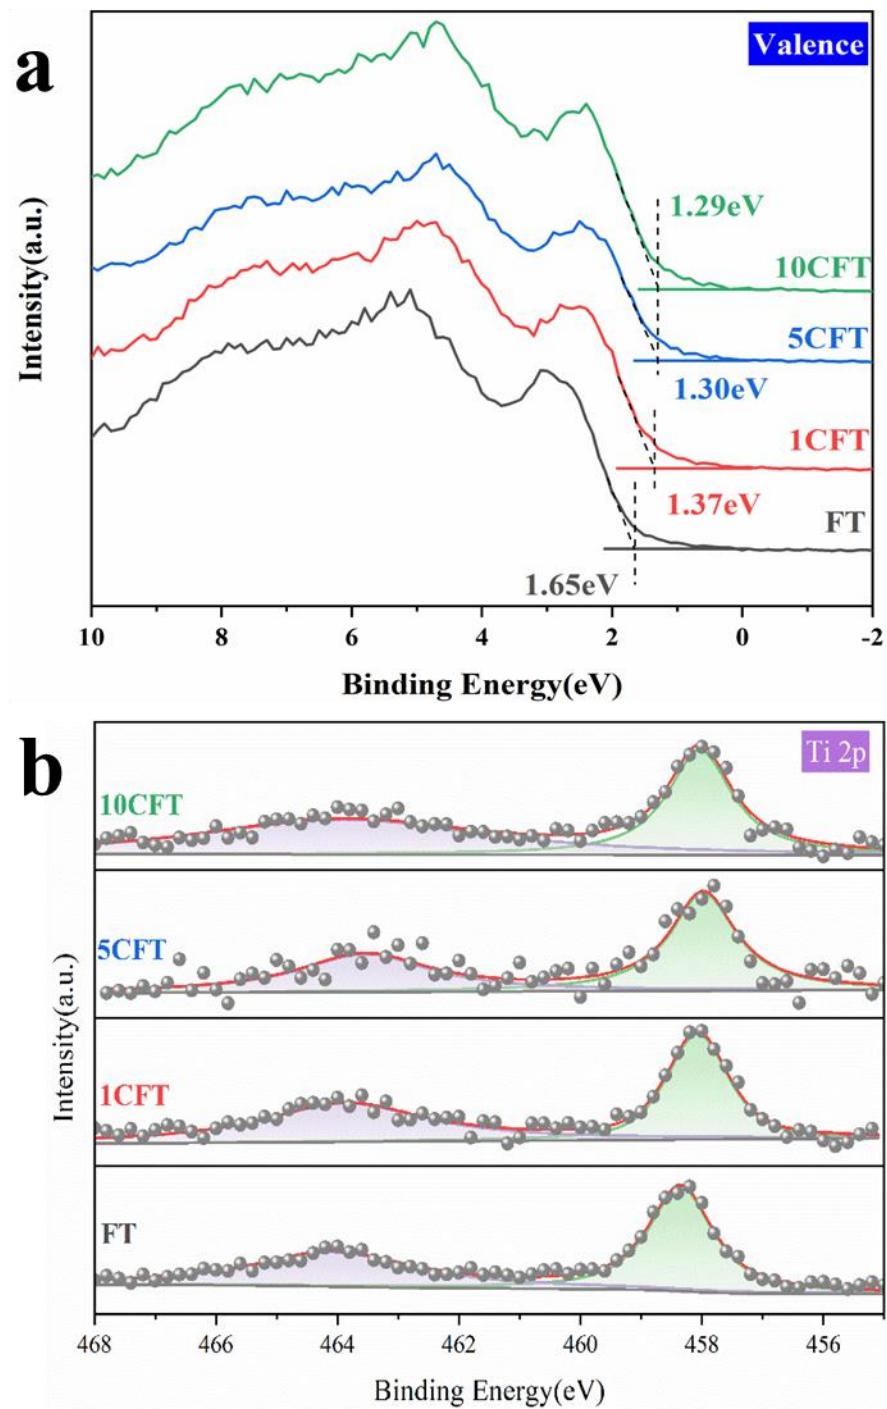

**Figure S1.** XPS Valence of  $\text{Fe}_2\text{O}_3$  (FT) and Ce-doped  $\text{Fe}_2\text{O}_3$  (1CFT, 5CFT, 10CFT).(a); Ti 2p (b)

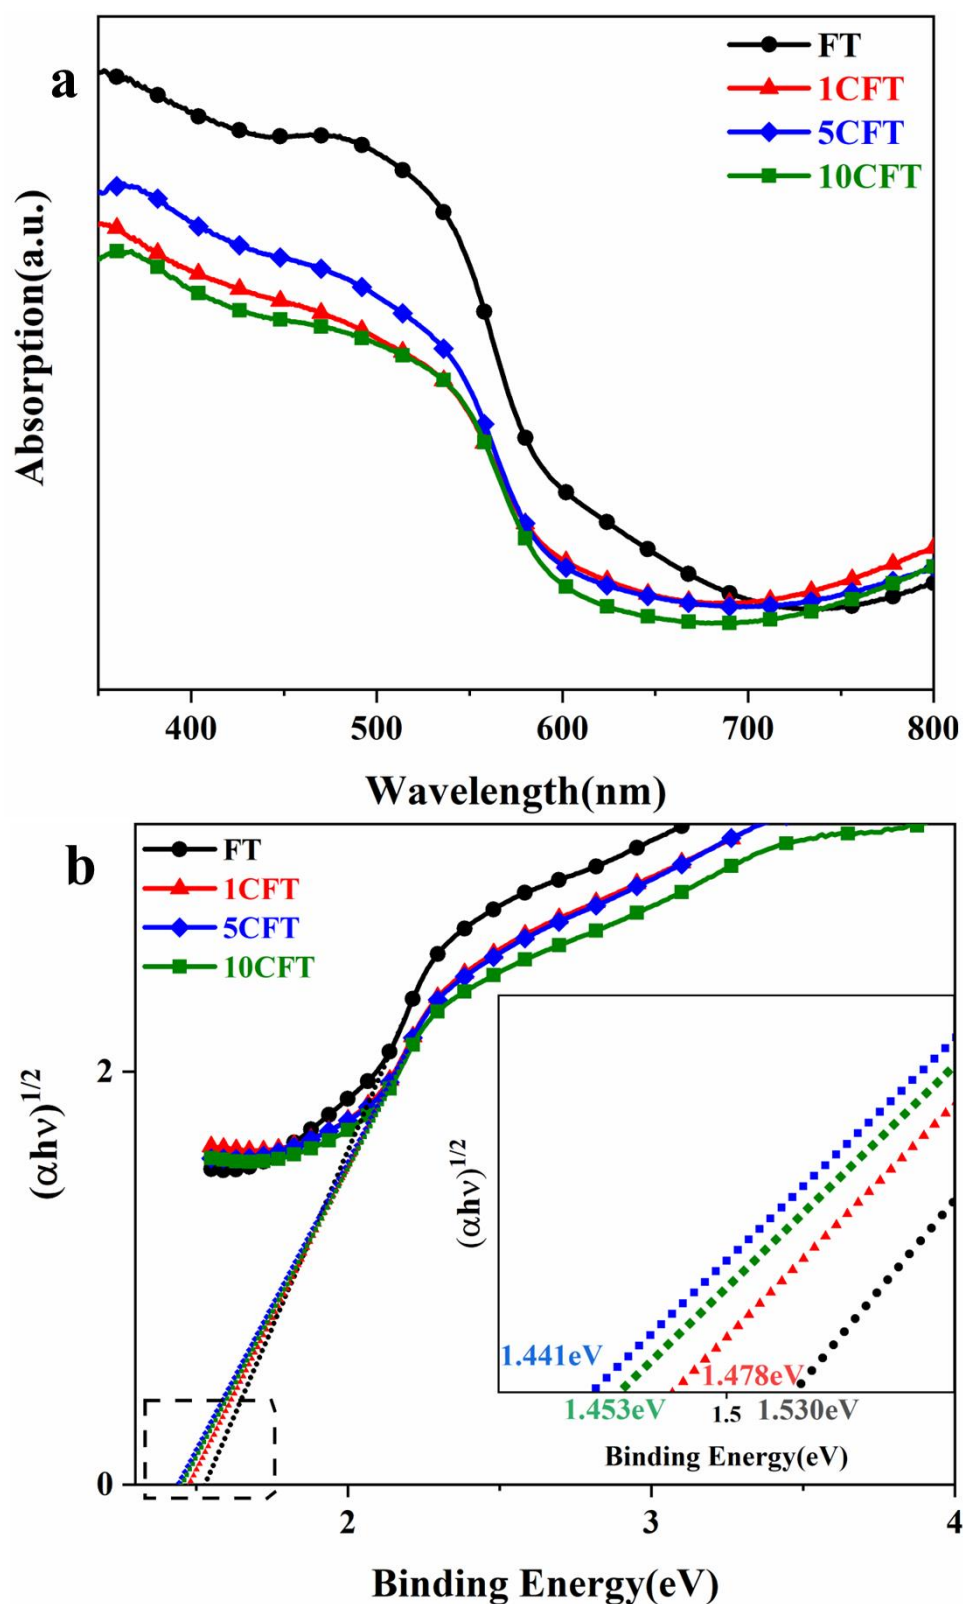

**Figure S2.** UV-vis absorption profile of Fe<sub>2</sub>O<sub>3</sub> (FT) and Ce-doped Fe<sub>2</sub>O<sub>3</sub> (1CFT, 5CFT, 10CFT). (a) and optical bandgaps, inset is the refined spectrum of 0.4eV-1.7eV(b)

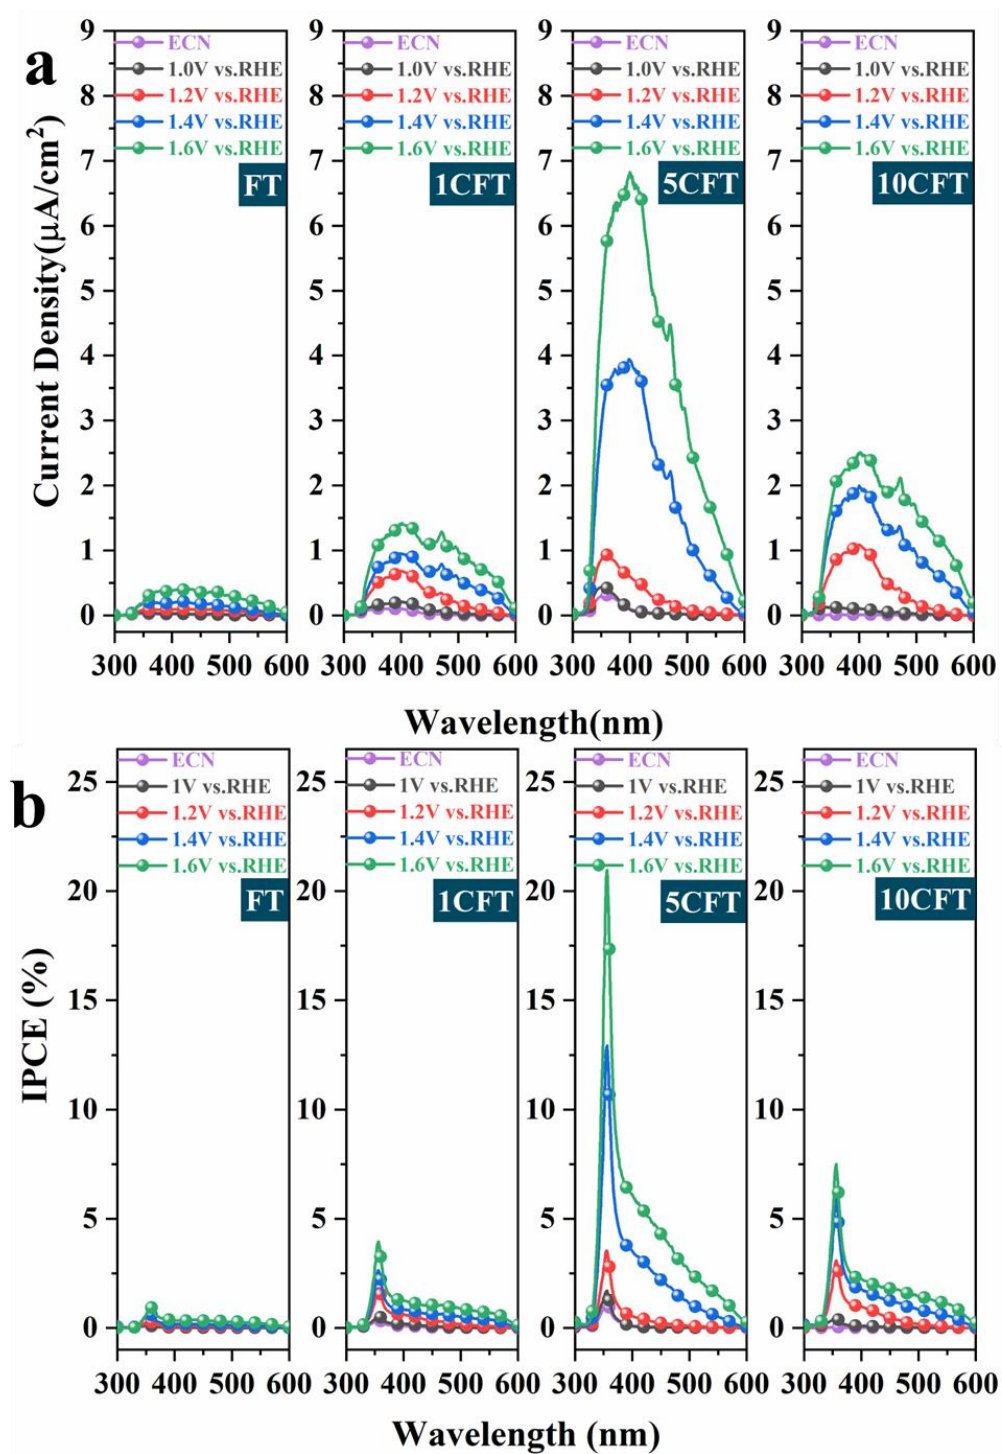

**Figure S3.** (a) Photocurrent density versus the monochromatic light; (b) IPCE values of FT, 1CFT, 5CFT, 10CFT under different bias

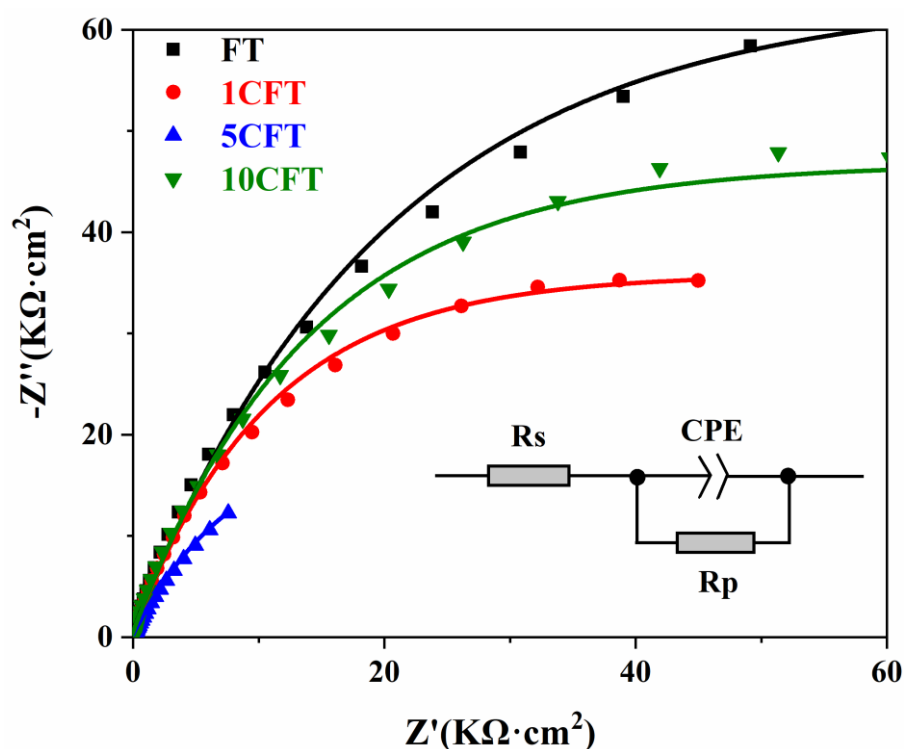

**Figure S4** Electrochemical impedance spectroscopy (EIS) and Equivalent Circuit of  $\text{Fe}_2\text{O}_3$  nanorods and Ce doped  $\text{Fe}_2\text{O}_3$  nanorods samples

**Table S3** Fitting data for each component in the fitted circuit for each sample

| samples | $R_s$  | $\text{CPE}-\sigma$     | $\text{CPE}-m$ | $R_p$                 |
|---------|--------|-------------------------|----------------|-----------------------|
| FT      | 2.0722 | $2.1915 \times 10^{-5}$ | 0.88228        | $1.6133 \times 10^5$  |
| 1CFT    | 1.2783 | $2.7865 \times 10^{-5}$ | 0.85492        | $0.89992 \times 10^5$ |
| 5CFT    | 1.1421 | $15.332 \times 10^{-5}$ | 0.75145        | $0.79914 \times 10^5$ |
| 10CFT   | 1.877  | $1.4352 \times 10^{-5}$ | 0.87341        | $1.0574 \times 10^5$  |

$R_p$  is expressed as the resistance of the charge transfer between redox pairs occurring on the surface of the sample. The non-Faraday electrode capacitance owing to charge accumulation on the  $\text{Fe}_2\text{O}_3$  surface is represented by a constant-phase element (CPE).  $R_p$  in parallel with the CPE is indicated by two charge paths for the electrons at the surface of the sample. The resistance  $R_s$  in series with both  $R_p$  and CPE represents the voltage drop in the electrolyte between the working electrode and reference electrode.

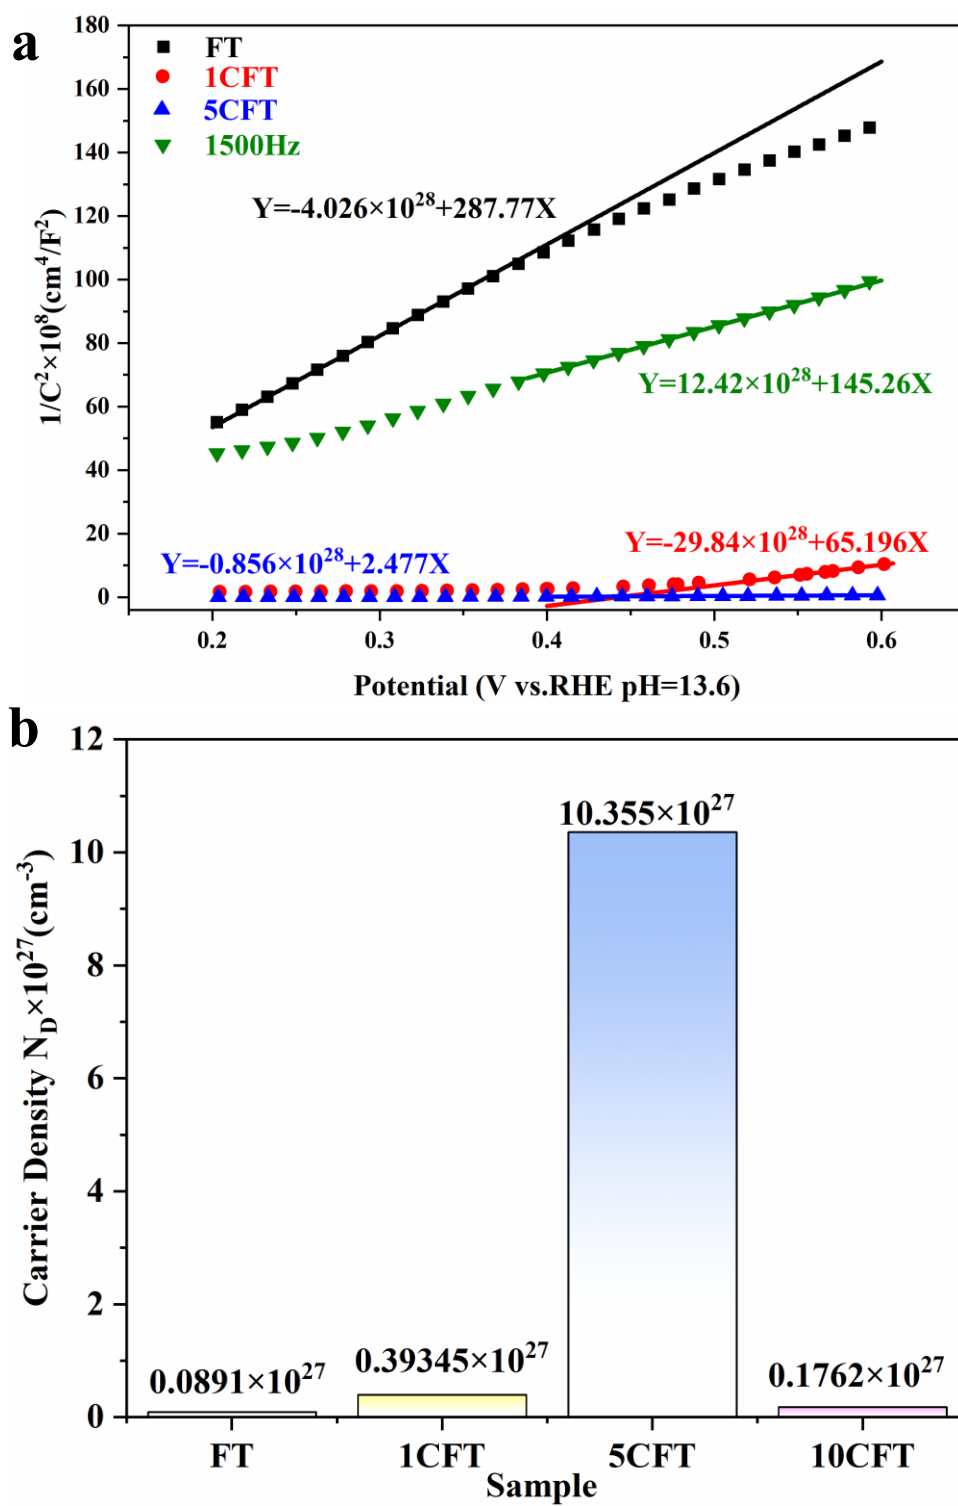

**Figure S5.** (a) Mott-Schottky plots collected at 1.5 kHz at a linear potential region between 0.2 to 0.6V vs. RHE and (b) Calculated carrier densities of  $\text{Fe}_2\text{O}_3$  (FT) and Ce-doped  $\text{Fe}_2\text{O}_3$  (1CFT, 5CFT, 10CFT).

## References

- [1] S. Kim, E. An, I. Oh, J.B. Hwang, S. Seo, Y. Jung, J.-C. Park, H. Choi, C.H. Choi, S. Lee, CeO<sub>2</sub> nanoarray decorated Ce-doped ZnO nanowire photoanode for efficient hydrogen production with glycerol as a sacrificial agent, *Catalysis Science & Technology*, 12 (2022) 5517-5523.
- [2] P. Senthilkumar, D.A. Jency, T. Kavinkumar, D. Dhayanithi, S. Dhanuskodi, M. Umadevi, S. Manivannan, N.V. Giridharan, V. Thiagarajan, M. Sriramkumar, K. Jothivenkatachalam, Built-in Electric Field Assisted Photocatalytic Dye Degradation and Photoelectrochemical Water Splitting of Ferroelectric Ce Doped BaTiO<sub>3</sub> Nanoassemblies, *ACS Sustainable Chemistry & Engineering*, (2019).
- [3] Y. Tan, S. Zhang, R. Shi, W. Wang, K. Liang, Visible light active Ce/Ce<sub>2</sub>O/CeO<sub>2</sub>/TiO<sub>2</sub> nanotube arrays for efficient hydrogen production by photoelectrochemical water splitting, *International Journal of Hydrogen Energy*, 41 (2016) 5437-5444.
